# Supplementary material for: Obesity Affects the Proliferative Potential of Equine Endometrial Progenitor Cells and Modulates Their Molecular Phenotype Associated with Mitochondrial Metabolism
Source: MDPI journal article supplement (doi:10.3390/cells11091437), 2022-04-24
Supplement: s1 [file s1]

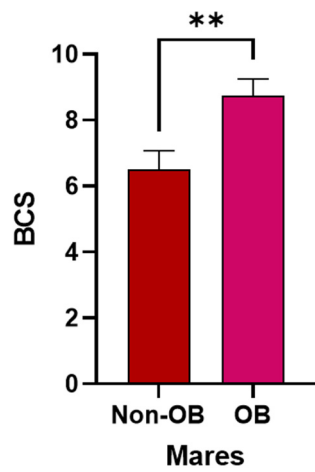

**Figure S1.** The results of body condition score (BCS) examination performed on live mares for proper classification of animals. Columns with bars represent mean  $\pm$  SD. \*  $p$ -value  $< 0.05$ , \*\*  $p$ -value  $< 0.01$ .
