# Supplementary material for: Obesity Affects the Proliferative Potential of Equine Endometrial Progenitor Cells and Modulates Their Molecular Phenotype Associated with Mitochondrial Metabolism
Source: Cells. 2022 Apr 24;11(9):1437. doi: 10.3390/cells11091437 (PMC9100746; doi:10.3390/cells11091437)
Supplement: Supplementary file 1 [file cells-11-01437-s001.zip]

Archive with 5 entries (5 files):
- Figure S1.pdf
- Table 1S_Cells_2022.xlsx
- Table S2_Cells2022.xlsx
- Table S3_Cells2022.xlsx
- Table S4_Cells2022.xlsx
