# Supplementary material for: Obesity Affects the Proliferative Potential of Equine Endometrial Progenitor Cells and Modulates Their Molecular Phenotype Associated with Mitochondrial Metabolism
Source: Cells. 2022 Apr 24;11(9):1437. doi: 10.3390/cells11091437 (PMC9100746; doi:10.3390/cells11091437)
Supplement: Supplementary file 1 [file cells-11-01437-s001.zip › Table 1S_Cells_2022.xlsx]

## Sheet: Table S1
Gene abbreviation	Full gene name	Primer	Sequence 5'-3'	Loci	Amplicon lenght [bp]	Accesion no.	Annealing temperature [⁰C]
VIM	Vimentin	FW	GCAGGATTTCTCTGCCTCTT	1371-1390	203	NM_001243145.1	61.2
		RV	TATTGCTGCACCAAGTGTGT	1573-1554
BCL-2	B-cell lymphoma 2	FW	TTCTTTGAGTTCGGTGGGGT	1534-1553	164	XM_001490436.4	61.2
		RV	GGGCCGTACAGTTCCACAA	1697-1679
BAX	Bcl-2-associated X protein	FW	CGAGTGGCAGCTGAGATGTT	779-798	153	XM_023650076.1	61.2
		RV	AAGGAAGTCCAGTGTCCAGC	931-912
CASP9	Caspase 9	FW	CACCTTCCCAGGCTTTGTCT	1248-1267	224	XM_005607504.3	61.2
		RV	GGCTCTGGCCTCAGTAAGTT	1471-1452
P53	Tumor protein p53	FW	TTTCGACATAGCGTGGTGGT	598-617	180	NM_001202405.1	61.2
		RV	CTCAAAGCTGTTCCGTCCCA	777-758
P21	Cyclin Dependent Kinase Inhibitor 1A	FW	GAAGAGAAACCCCCAGCTCC	1151-1170	241	XM_023633878.1	53.2
		RV	TGACTGCATCAAACCCCACA	1391-1372
FOXP3	Forkhead box P3	FW	CTGGTTCACACGCATGTTCG	1251-1270	149	NM_001163272.1	62
		RV	TGCGGAACTCGAACTCATCC	1399-1380
SIRT1	Sirtuin 1	FW	ACCAACGGTTTTCATTCTTGTGA	531-553	139	XM_023643979.1	57
		RV	TTCGAGGATCTGTGCCAATCA	669-649
OPN	Osteopontin	FW	CATCGCCTATGCCCTTCCAG	169-188	217	XM_001496152.4	57.3
		RV	TGTGTGGTCATGGCTTTCGT	385-366
MFN	Mitofusin 1	FW	AAGTGGCATTTTTCGGCAGG	384-403	217	XM_005601821.3	61
		RV	TCCATATGAAGGGCATGGGC	600-581
AKT	AKT serine/threonine kinase 1	FW	AAGGAGATCATGCAGCACCG	1297-1316	180	XM_023628568.1	58.5
		RV	CTCCATCGTGTCGTCTTGGT	1476-1457
PI3K	Phosphoinositide-3-kinase regulatory subunit 1	FW	GACTTGCACTTGGGTGACATA	710-730	152	XM_023625590.1	56.7
		RV	TAAGTTCCCGGAAAGTCCCC	861-842
GAPDH	Glyceraldehyde-3-phosphate dehydrogenase	FW	GATGCCCCAATGTTTGTGA	427-445	250	NM_001163856.1	60
		RV	AAGCAGGGATGATGTTCTGG	676-657
UQCRC2	Ubiquinol-cytochrome c reductase core protein 2	FW	TGCTTCGTCTTGCATCCAGT	370-389	193	XM_001494381.5	61
		RV	AACTCCGGTGACGTGGTAAC	562-543
TFAM	Transcription factor A, mitochondrial	FW	ATGATGGCTTTGAGTCCAGG	190-209	154	XM_023643450.1	61
		RV	CTAGATGATGGCGGGAGACTT	343-323
PUSL1	Pseudouridylate synthase-like 1	FW	TCAGCCACTTCCAGGACCTA	473-492	120	XM_023636046.1	61
		RV	AGCCACATCCAAGCTGTCTG	592-573
NDUFA9	NADH:ubiquinone oxidoreductase subunit A9	FW	TTGGTATTCAGGCCACACCC	1112-1131	103	XM_001494601.4	61
		RV	GCTGGCTTCACGTCTTCAAC	1214-1195
COX4I1	Cytochrome c oxidase subunit 4I1	FW	GAATAGGGGCACGAACGAGT	432-451	138	XM_023637444.1	61
		RV	GCCACCCACTCCTCTTCAAA	569-550
PIGBOS1	PIGB opposite strand 1	FW	GTTGGGGTGGCTCAGATCAA	785-804	126	XM_014733689.2	61
		RV	ACCCCTCCTTTACCGCTACT	910-891
MRPL24	Mitochondrial ribosomal protein L24	FW	ATGATCCCTAGCGAAGCACC	515-534	123	XM_001500466.4	59.5
		RV	TGTAGAGACTCGTACCCGCT	637-618
MTERF4	Mitochondrial transcription termination factor 4	FW	CGCCACCTCCGTGCTATG	15-32	147	XM_023644068.1	59.5
		RV	CCCAAATGAGGGGCATCAGG	161-142
OXA1L	Mitochondrial inner membrane protein	FW	GACCTAGAAACCGTGGGACG	1576-1595	105	XM_005603213.3	59.5
		RV	GGAAGATCACTTGGCTCCCC	1680-1661
PPARGC1β	PPARG coactivator 1 beta	FW	CCTCAACTATCTTGCCGACACC	164-185	165	XM_023617445.1	59.5
		RV	ATGGGTTCAGTCTCGGGGT	328-310
18S	18S ribosomal RNA	FW	GGGGAATCAGGGTTCG	389-404	209	NR_046271.1	59
		RV	GCTGGCACCAGACTTG	597-582
TBP		FW	CCAAGCGTTTTGCTGCT	914-930	101	XM_014738168.2	59
	TATA-box binding protein	RV	TTCACTCTTGGCTCCCG	1014-998
GAPDH	glyceraldehyde-3 -phosphate dehydrogenase	FW	GAAGATGTGGCGCGATGGCC	627-646	147		59
		RV	ACTGACACGTTAGGGGTGGGGAC	773-751		NM_001163856.1
CD29		FW	GGCTAACAGGGAGTTTCAGAT	2021-03-23	100		59
	integrin subunit beta 1 (ITGB1)	RV	ACATCTATTTTCATCTGCTTGGC	102-80		NM_001301217.1
CD44	CD44 molecule	FW	CCCACGGATCTGAAACAAGTG	864-884	95		59
		RV	TTCTGGAATTTGAGGTCTCCGTAT	958-935		NM_001085435.2
CD90 (THY1)	Thy-1 cell surface antigen	FW	TGCGAACTCCGCCTCTCT	359 -376	93	XM_023644995.1	59
		RV	GCTTATGCCCTCGCACTTG	451-433
CD105 (ENG)	endoglin	FW	GACGGAAAATGTGGTCAGTAATGA	1593-1616	101	XM_003364144.4	59
		RV	GCGAGAGGCTCTCCGTGTT	1693-1675
CD146 (MCAM)	melanoma cell adhesion molecule	FW	CTGGACTTGGAAACCACAACATC	1017-1039	85	XM_023644992.1	59
		RV	CAGGTCTCACTCGGACATCAGA	1101-1080
NG2 (CSPG4)	chondroitin sulfate proteoglycan 4	FW	CGCATCATTGGGCCCTACTT	5329-5348	142	XM_005602901.3	59
		RV	GCTGTTCCACCTCTCTCCAG	5470-5451
CD34	CD34 molecule	FW	CACTAAACCCTCTACATCATTTTCTCCTA	537-565	101	XM_005609830.3	59
		RV	GGCAGATACCTTGAGTCAATTTCA	637-614
CD45	protein tyrosine phosphatase receptor type C	FW	TGATTCCCAGAAATGACCATGTA	142-164	101		59
		RV	ACATTTTGGGCTTGTCCTGTAAC	242-220		NM_001309162.1
MUC-1	mucin 1, cell surface associated	FW	CTATCTCGTTGCCCTGGCTG	2178-2197			59
		RV	GTAGGCATCACGGGTTGGAA	2259-2240	82	XM_023641049.1
		FW	CTAACAACGTCCTCTCCGGG	916-935			59
ACTA2	actin alpha 1	RV	CTGCTGGAAGGTGGACAGAG	1094-1075	179	NM_001317258.1
		FW	CGGCAACTTCATGGACG	235-251			59
CNN1	calponin 1	RV	TTCTCCAGCTGGTGCCAAT	354-336	120	XM_023645349.1
		FW	ATCCATCCTGACCCCACGTA	1333-1352			59
MHY11	myosin heavy chain 11	RV	CGGAAGAGCCGCTCATAAGT	1452-1433	120	XM_023616273.1
