# Supplementary material for: Obesity Affects the Proliferative Potential of Equine Endometrial Progenitor Cells and Modulates Their Molecular Phenotype Associated with Mitochondrial Metabolism
Source: Cells. 2022 Apr 24;11(9):1437. doi: 10.3390/cells11091437 (PMC9100746; doi:10.3390/cells11091437)
Supplement: Supplementary file 1 [file cells-11-01437-s001.zip › Table S2_Cells2022.xlsx]

## Sheet: Table 2S
miRNA	Sequence	RT primer	qPCR primer		Sequence accesion no.
eca-let-7a	UGAGGUAGUAGGUUGUAUAGUU	TACTACCTCATACTCCTCTCCAGGTACAGTTGGTACCTGCTCTACCTTAACTAT	FV	AGTAAGGTTGTATAGTTG	MI0012731
			RV	TAGTAGGTTGTATAGTTG
hsa-let-7b	UGAGGUAGUAGGUUGUGUGGUU	ACCTAACATGCTCTCCAGGTACAGTTGGTACCTGTCTCCACTTAACCA	FV	TAGTAGGTTGTGTGGTTG	MI0000063 (homologous)
			RV	TGAGGTAGTAGGTTGTGTGGTTG
eca-let-7c	UGAGGUAGUAGGUUGUAUGGUU	ACCTAACATGCTCTCCAGGTACAGTTGGTACCTGTCTCCACTTAACCA	FV	TAGTAGGTTGTATGGTTG	MI0012925
			RV	TGAGGTAGTAGGTTGTATGGTTGG
eca-miR-20a-5p	UAAAGUGCUUAUAGUGCAGGUAG	CACTTTACCGAACCACAGAGCTAGAGAACCTAGCTCACACACACACTACCT	FV	CCGCACTTTACCGAACCACAGAG	MI0012835
			RV	GCGTAAAGTGCTTATAGTGCAGG
eca-miR-29a-3p	UAGCACCAUCUGAAAUCGGUUA	AGATGGCAGCAGAGACGAGCTAGAGAACCTAGCTCAAGAACAATTAACCG	FV	AGATGGCAGCAGAGACGAG	MI0012694
			RV	CGTAGCACCATCTGAAATCGG
eca-miR-133b-3p	UUUGGUCCCCUUCAACCAGCUA	GACCAAAAGAGAGAAAGAGAGCTAGAGAACCTAGCTCAAGGAGAAGTAGCTG	FV	CGGACCAAAAGAGAGAAAGAGAG	MI0012844
			RV	CGTTTGGTCCCCTTCAACCAG
eca-miR-181a-5p	AACAUUCAACGCUGUCGGUGAGU	AGCGTTGCAGCACACCAGAGCTAGAGAACCTAGCTCCACCACCAGACTCAC	FV	AGCGTTGCAGCACACCAGAG	MI0012920
			RV	AACATTCAACGCTGTCGGTG
eca-U6sn	CGCTTCGGCAGCACATATACTAAAATTGGAACGATACAGAGAAGATTAGCATGGCCC	GGGCCATGCTAATCTTCTCTG	FV	CGCTTCGGCAGCACAT	XR_002805016.1
			RV	GGGCCATGCTAATCTTCTCTG
