# Supplementary material for: Obesity Affects the Proliferative Potential of Equine Endometrial Progenitor Cells and Modulates Their Molecular Phenotype Associated with Mitochondrial Metabolism
Source: Cells. 2022 Apr 24;11(9):1437. doi: 10.3390/cells11091437 (PMC9100746; doi:10.3390/cells11091437)
Supplement: Supplementary file 1 [file cells-11-01437-s001.zip › Table S3_Cells2022.xlsx]

## Sheet: Table 3S
Detected protein	Antibody dilution used in WB	Catalog no.	Manufacturer
Primary antibodies
AKT	1:1000	44-609G	Thermofisher scientific, Warsaw, Poland
FoxP3	1:500	PA5-23169	Thermofisher scientific, Warsaw, Poland
MFN1	1:500	orb11040	Biorbyt, Biokom, Janki, Poland
OPN	1:1000	ab8448	Abcam, Symbios, Straszyn, Poland
PI3K	1:500	PA5-83748	Thermofisher scientific, Warsaw, Poland
SIRT1	1:500	ARP32386	Aviva Systems Biology, Biokom, Janki, Poland
Secondary antibodies
Goat Anti-Rabbit IgG Antibody, Fc, HRP conjugate	1:2500	ap156p	Sigma-Aldrich/Merck, Poznan, Polska
Anti-Mouse IgG (Fc specific)–Peroxidase antibody produced in goat	1:10000	A0168	Sigma-Aldrich/Merck, Poznan, Polska
