# Supplementary material for: Obesity Affects the Proliferative Potential of Equine Endometrial Progenitor Cells and Modulates Their Molecular Phenotype Associated with Mitochondrial Metabolism
Source: Cells. 2022 Apr 24;11(9):1437. doi: 10.3390/cells11091437 (PMC9100746; doi:10.3390/cells11091437)
Supplement: Supplementary file 1 [file cells-11-01437-s001.zip › Table S4_Cells2022.xlsx]

## Sheet: Table 4S
Detected protein	Antibody dilution	Catalog no.	Manufacturer
Primary antibodies
CD44	1:1000	hpa005785	Sigma-Aldrich/Merck, Poznan, Polska
CD45	1:100	sc-53047	Santa Cruz Biotechnology, Dallas, Texas, USA
CD73	1 µg/mL	ab54217	Abcam, Cambridge, UK
CD90	1:100	ab92574	Abcam, Cambridge, UK
CD105	1:100	CF802394	Thermofisher scientific, Warsaw, Poland
Ki67	1 µg/mL	ab15580	Abcam, Cambridge, UK
AKT	1:1000	44-609G	Thermofisher scientific, Warsaw, Poland
PI3K	1:500	PA5-83748	Thermofisher scientific, Warsaw, Poland
Secondary antibodies
Anti-mouse IgG—Atto 594 produced in goat	1:1000	76085	Sigma-Aldrich/Merck, Poznan, Polska
Anti-Rabbit IgG - Atto 594 produced in goat	1:1000	77671	Sigma-Aldrich/Merck, Poznan, Polska
